# Supplementary material for: Enhanced Production of Erythritol from Glucose by the Newly Obtained UV Mutant Yarrowia lipolytica K1UV15
Source: MDPI journal article supplement (doi:10.3390/molecules29102187), 2024-05-08
Supplement: s1 [file s1]

**Table S1.** Characteristics of UV mutants of *Y. lipolytica* on YM-agar plates.

| UV-exposure time [min] | Strain         | Growth on YM-agar |                |
|------------------------|----------------|-------------------|----------------|
|                        |                | Colony size [mm]  | Colony surface |
| 15                     | K1UV1          | 7.1               | smooth         |
| 15                     | K1UV3          | 6.5               | smooth         |
| 30                     | K1UV11         | 9.4               | smooth         |
| 5                      | K1UV15         | 6.9               | smooth         |
| 10                     | K1UV16         | 8.2               | rough          |
| 10                     | K1UV17         | 5.2               | rough          |
| 10                     | K1UV18         | 8.7               | smooth         |
| 10                     | K1UV20         | 9.2               | smooth         |
| 0                      | Wratislavia K1 | 8.0               | smooth         |
